# Supplementary material for: Structure and oxygen vacancy engineered CuCo-layered double oxide nanotube arrays as advanced bifunctional electrocatalysts for overall water splitting
Source: Royal Society of Chemistry journal article supplement (doi:10.1039/d3dt00695f), 2023-01-01
Supplement: d3dt00695f1.pdf [file d3dt00695f1.pdf]

## Electronic Supplementary Information

### Structure and Oxygen vacancy engineered CuCo-layered double oxides nanotube arrays as advanced bifunctional electrocatalysts for overall water splitting

*Zifeng Zeng<sup>1</sup>, Zhifeng Gao<sup>1</sup>, Zicheng Guo<sup>1</sup>, Xiaowei Xu<sup>1, 2\*</sup>, Yian Chen<sup>3</sup>, Ying Li<sup>1\*</sup>,*

*Dandan Wu<sup>1\*</sup>, Lin Lin<sup>4\*</sup>, Runping Jia<sup>1</sup>, Sheng Han<sup>4</sup>*

<sup>1</sup>School of Materials Science and Engineering, Shanghai Institute of Technology,  
Shanghai, 201418, PR China, xiaoweixu@sit.edu.cn

<sup>2</sup>State Key Laboratory of Polymer Materials Engineering, Chengdu 610065, PR China

<sup>3</sup>Shanghai Fengxian High School, Shanghai, 201400, PR China

<sup>4</sup>School of Chemical and Environmental Engineering, Shanghai Institute of  
Technology, Shanghai, 201418, PR China

Email: xiaoweixu@sit.edu.cn; liying86@sit.edu.cn; wdan1008@163.com;

linlin@sit.edu.cn

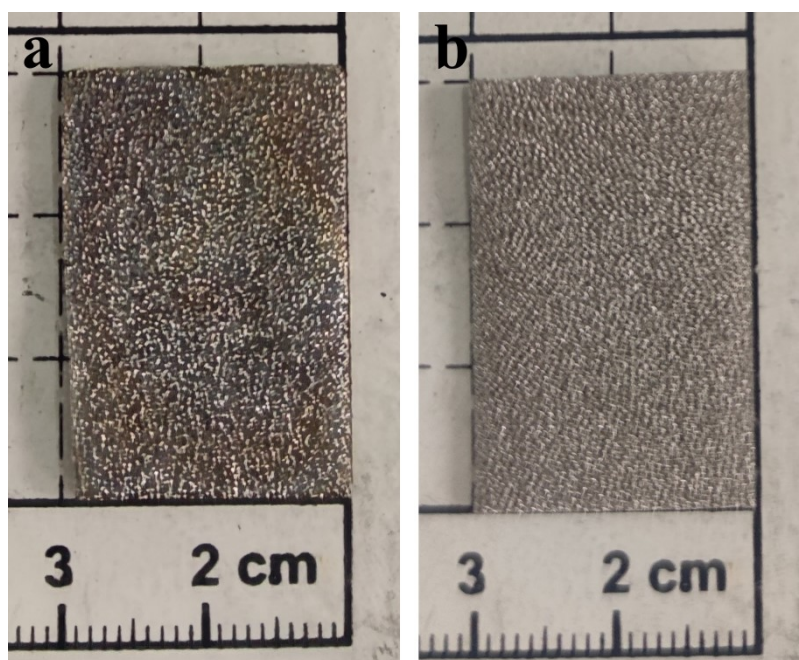

**Figure S1.** Photograph of NF a) before and b) after cleaning.

The bare NF (2 cm × 3 cm) was immersed in 3 M HCl for 10 min by ultrasonic treatment to remove the surface oxide layer, then washed with ethanol and DI water three times. Finally, the NF was air-dried and reserved.

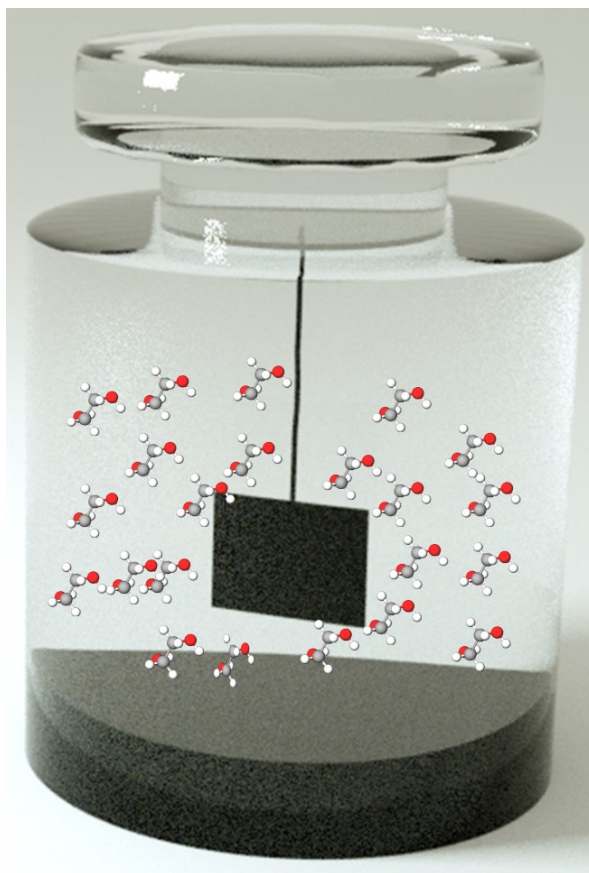

**Figure S2.** Schematic diagram of ethylene glycol gas phase reduction.

First, a NF coated with CuCo-LDO HNTAs was suspended in a wide bottle containing ethylene glycol (Figure S2, Supporting Information), which was sealed and placed in an oven. Second, when the temperature reached 200 °C, the ethylene glycol solution volatilized into gas, which filled the whole bottle. Finally, the ethylene glycol steam reacted with the CuCo-LDO HNTAs, leaving the outer topologically transformed to O-vacancy-rich CuCo-LDO HNTAs. Accordingly, the mechanism of this gas phase reduction process could be described via the following equations:

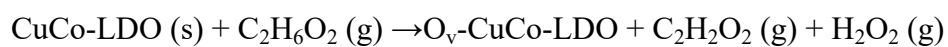

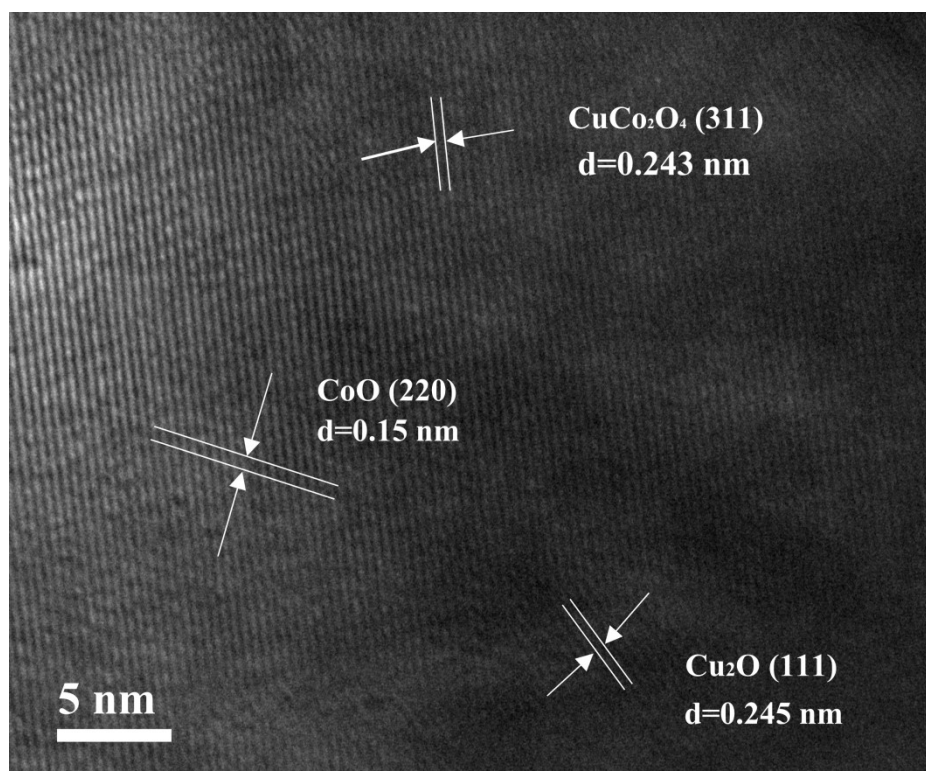

**Figure S3.** HRTEM image of CuCo-LDO.

The HRTEM image CuCo-LDO reveal the lattice fringes of the CuCo<sub>2</sub>O<sub>4</sub> (311) plane with a spacing of 0.243 nm, the CoO (220) plane with a spacing of 0.15 nm, as well as the (111) plane of CuO<sub>2</sub> with a spacing of 0.245 nm.

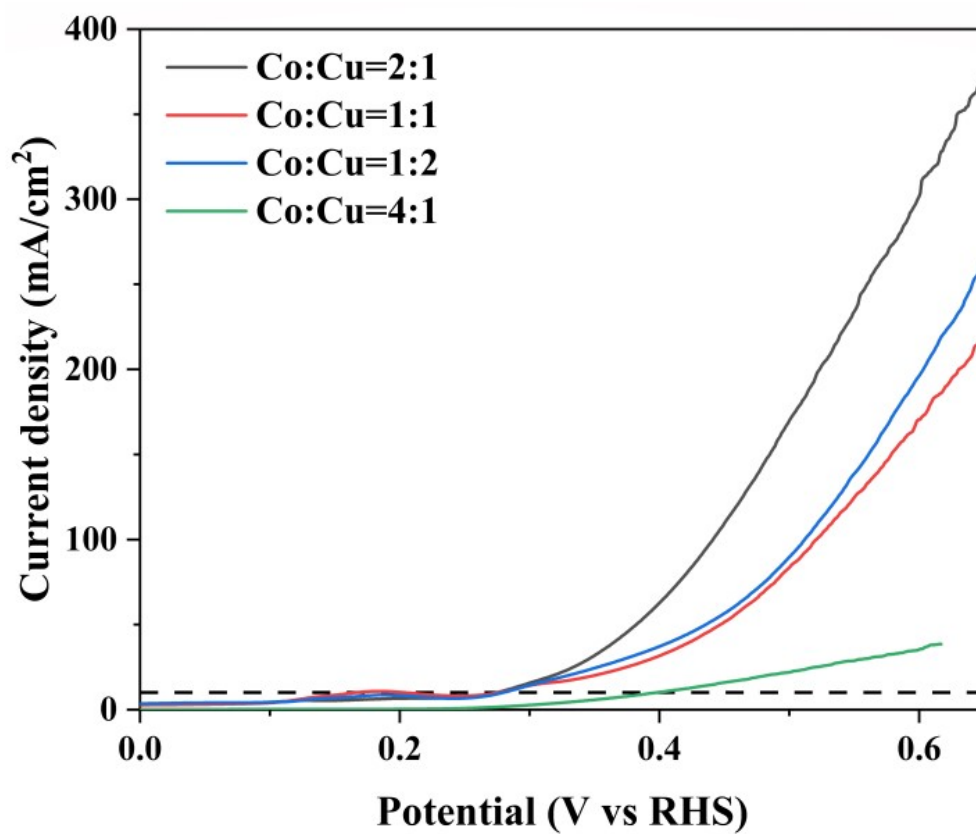

**Figure S4.** OER performances of CuCo-LDH with different Co-Cu ratios.

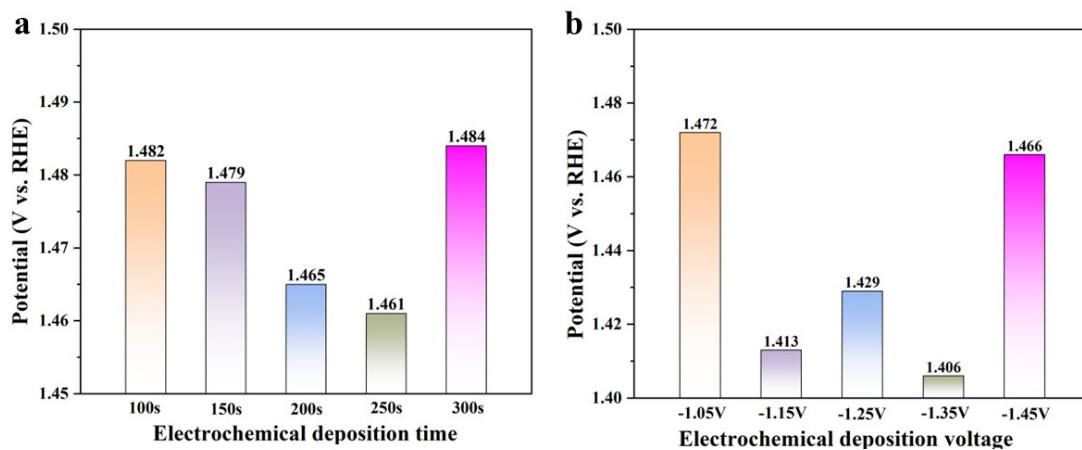

**Figure S5.** OER performance of CuCo-LDH under different electrochemical deposition conditions at 10 mA·cm<sup>-2</sup>: a) time; b) voltage.

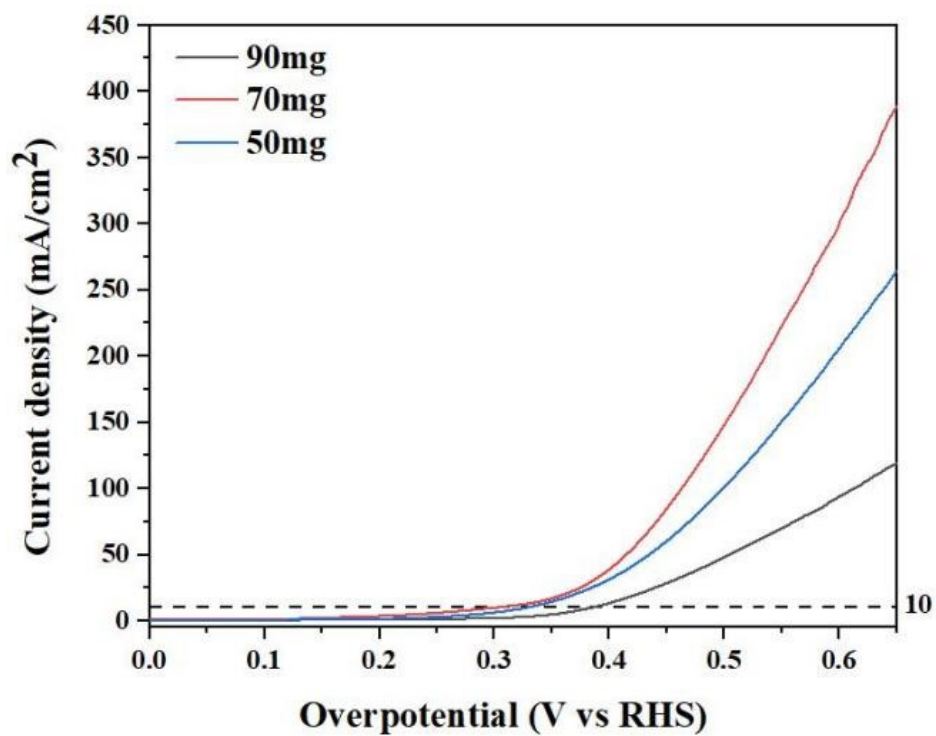

**Figure S6.** OER performances of MOF-CuCo-LDH HNTAs with different organic ligand content.

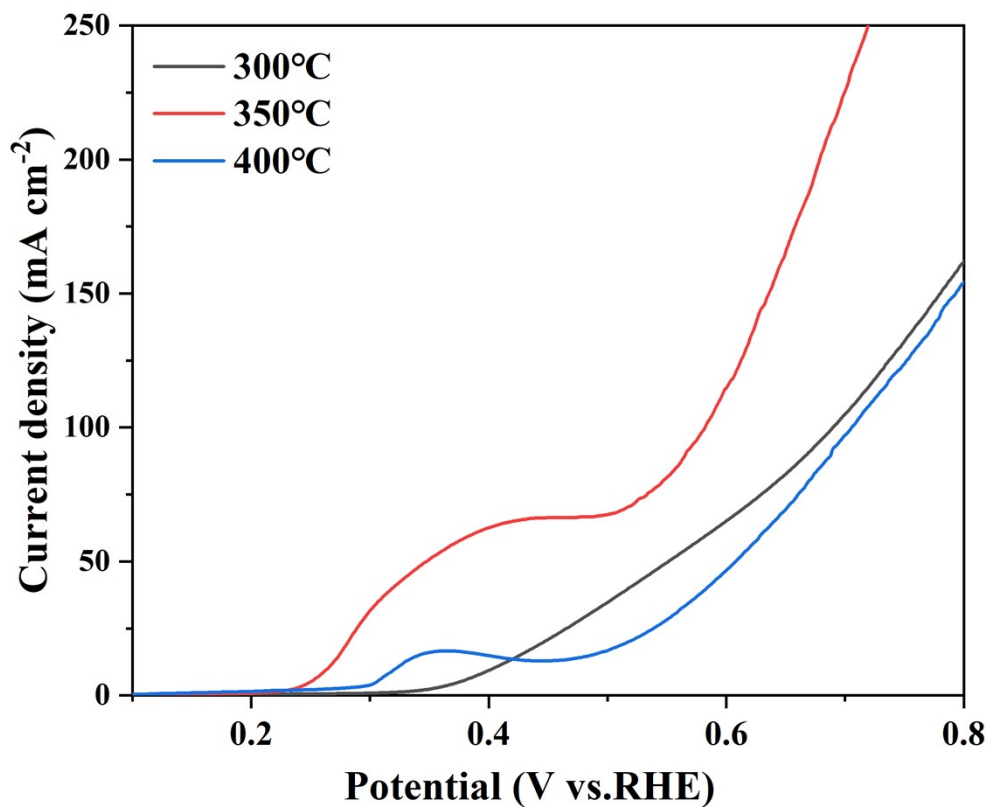

**Figure S7.** OER performances of CuCo-LDH HNTAs with different annealing temperatures.



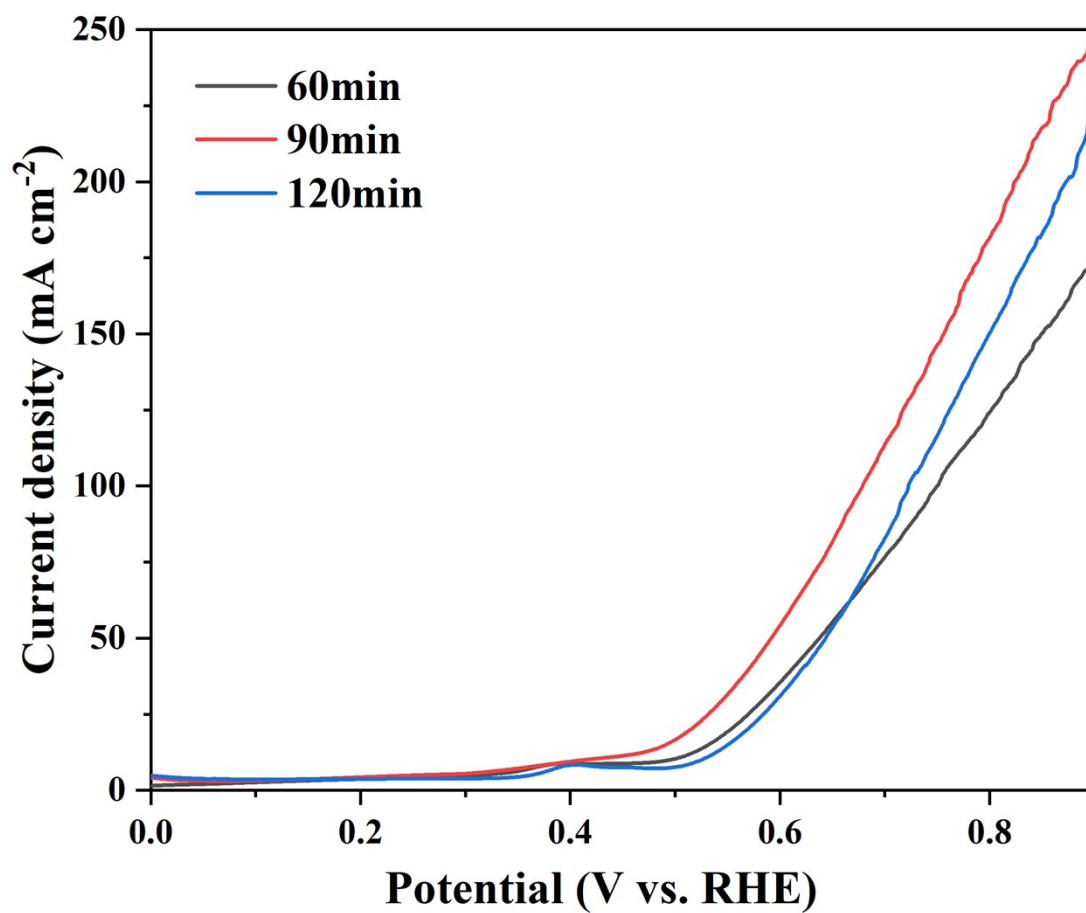

**Figure S8.** OER performances of O<sub>v</sub>-CuCo-LDO HNTAs with different annealing time.

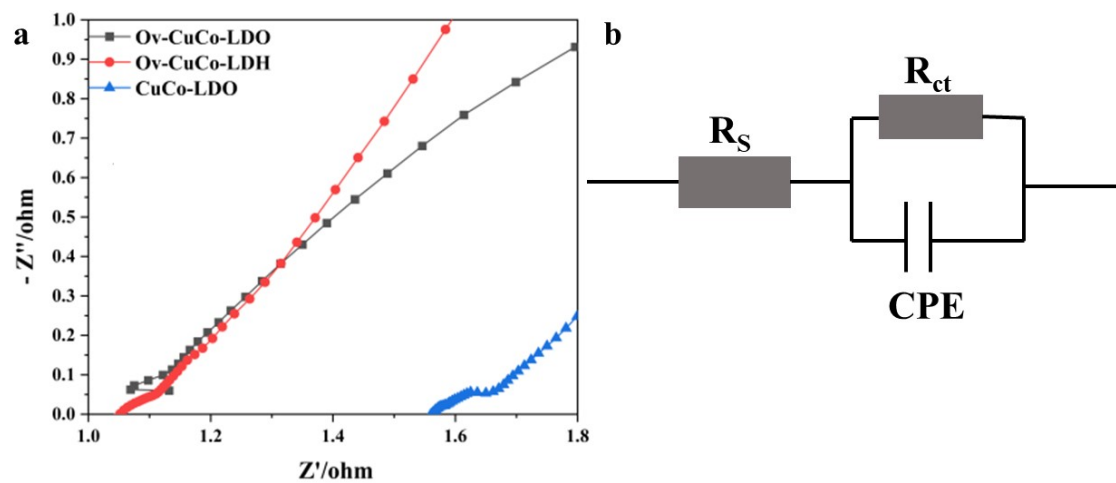

**Figure S9.** a) Impedance diagrams of,  $O_v$ -CuCo-LHD and CuCo-LDO for OER; b) the equivalent circuit of  $O_v$ -CuCo-LDO HNTAs.

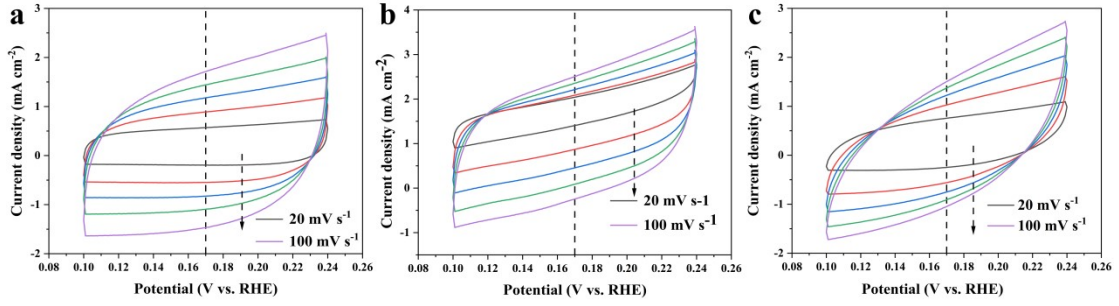

**Figure S10.** Cyclic voltammograms of a) O<sub>v</sub>-CuCo-LDO, b) CuCo-LDO, and c) CuCo-LDH in the non-faradaic capacitance current range.

The non-faradaic capacitance ( $C_{dl}$ ) is the key index for detecting the ECSA. CV curves of O<sub>v</sub>-CuCo-LDO, CuCo-LDH, and CuCo-LDO catalysts under different scan rates in a non-Faradaic region of 0.10 to 0.24 V (vs. RHE) are shown in Figure S10. The electrochemical double layer capacitance ( $C_{dl}$ ) is estimated by plotting the charging current differences  $\Delta j = (j_a - j_c)/2$  at the applied potential of 0.17 V (vs. RHE) against different scan rates from 20, 40, 60, 80, and 100 mV·s<sup>-1</sup>, in which the slope of the linear is fitted twice of  $C_{dl}$ .  $C_{dl}$  values are 66, 59, and 56 mF·cm<sup>-2</sup> for O<sub>v</sub>-CuCo-LDO, CuCo-LDH, and CuCo-LDO catalysts, respectively.

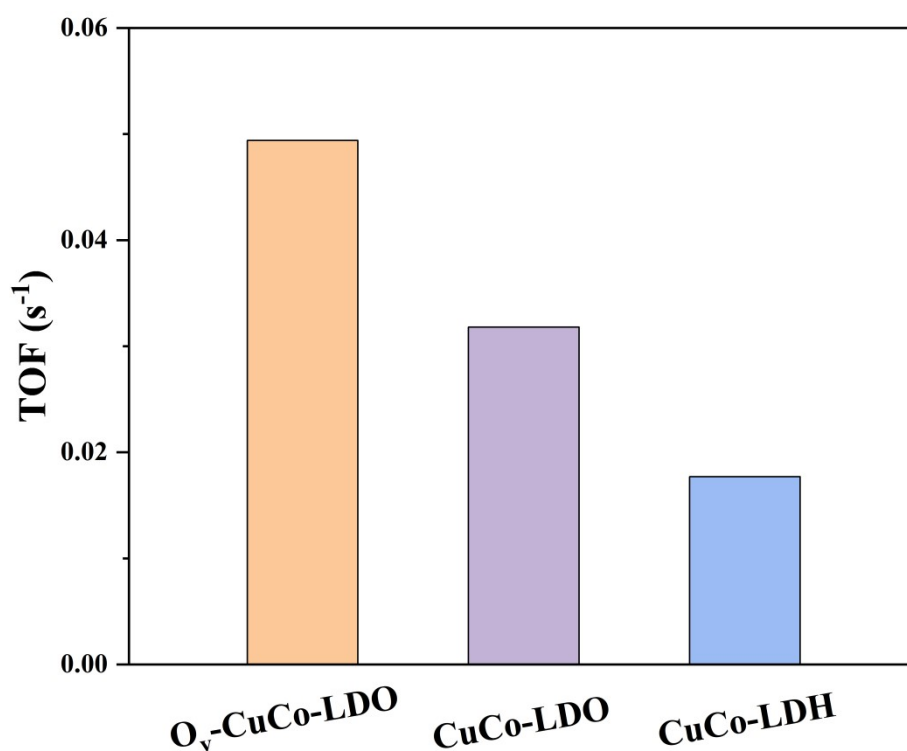

**Figure S11.** The TOF value of O<sub>v</sub>-CuCo-LDO, CuCo-LDO, and CuCo-LDH at an overpotential of 72.5 mV.

**Calculation of turnover frequency (TOF):** Assuming that every metal atom is involved in the OER electrocatalysis. The TOF value of different catalysts were estimated according to the following formula:

$$TOF = \frac{J \times A}{n \times F \times m}$$

Wherein, J (mA·cm<sup>-2</sup>) is the current density at a given overpotential (e.g. η=72.5 mV), A is the surface area of the electrode (1\*1 cm<sup>2</sup> for O<sub>v</sub>-CuCo-LDO), F is the Faraday constant (96485.3 C·mol<sup>-1</sup>), m is the number of moles of metal on the electrode, and n is the electron transfer number (4 for OER).

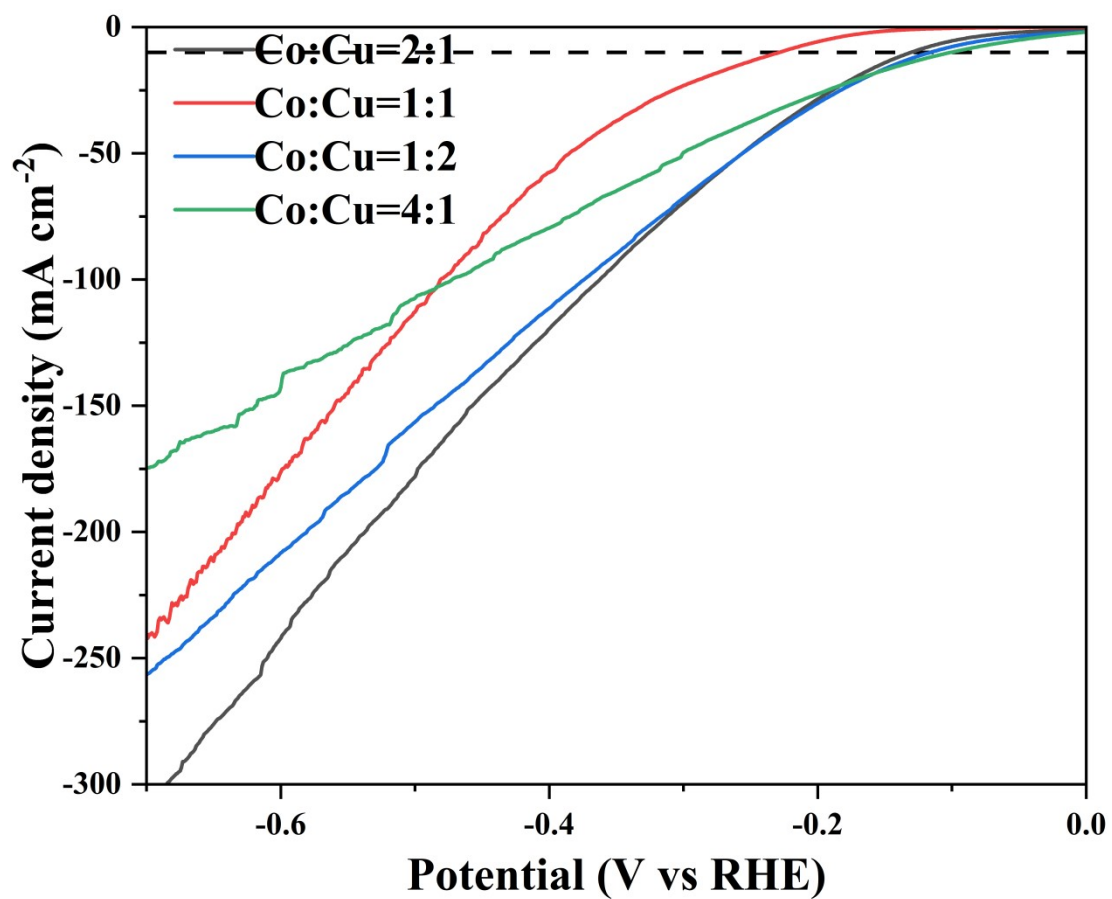

Figure S12. HER performances of CuCo-LDH with different Co-Cu ratios.

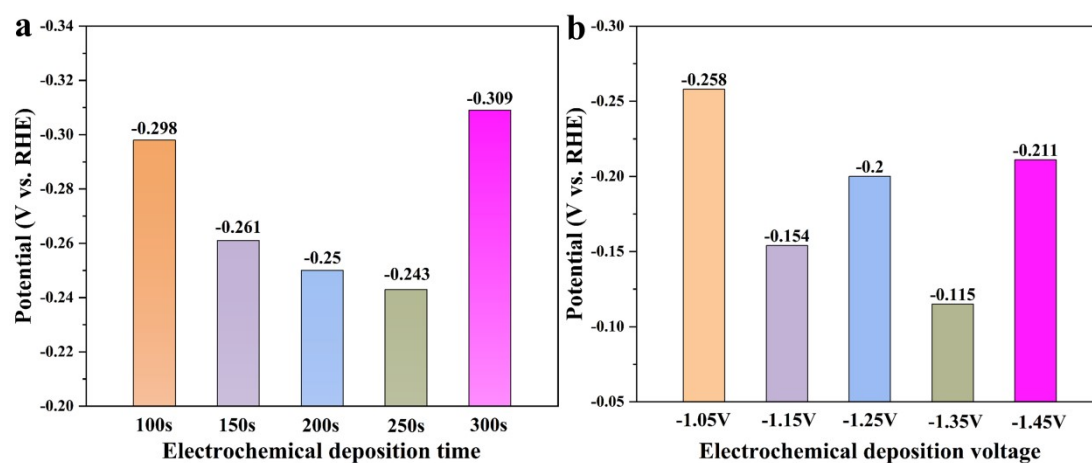

**Figure S13.** HER performance of CuCo-LDH under different electrochemical deposition conditions at 10 mA·cm<sup>-2</sup>: a) time; b) voltage.

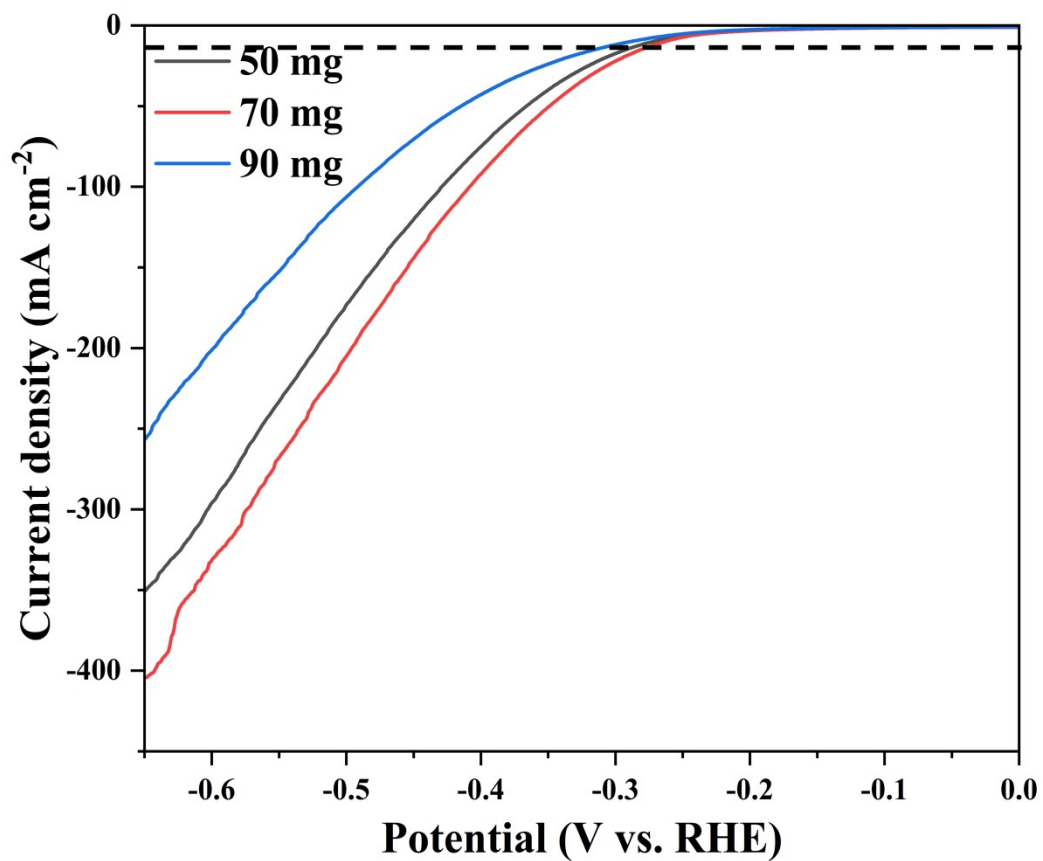

**Figure S14.** HER performances of MOF-CuCo-LDH HNTAs with different organic ligand content.

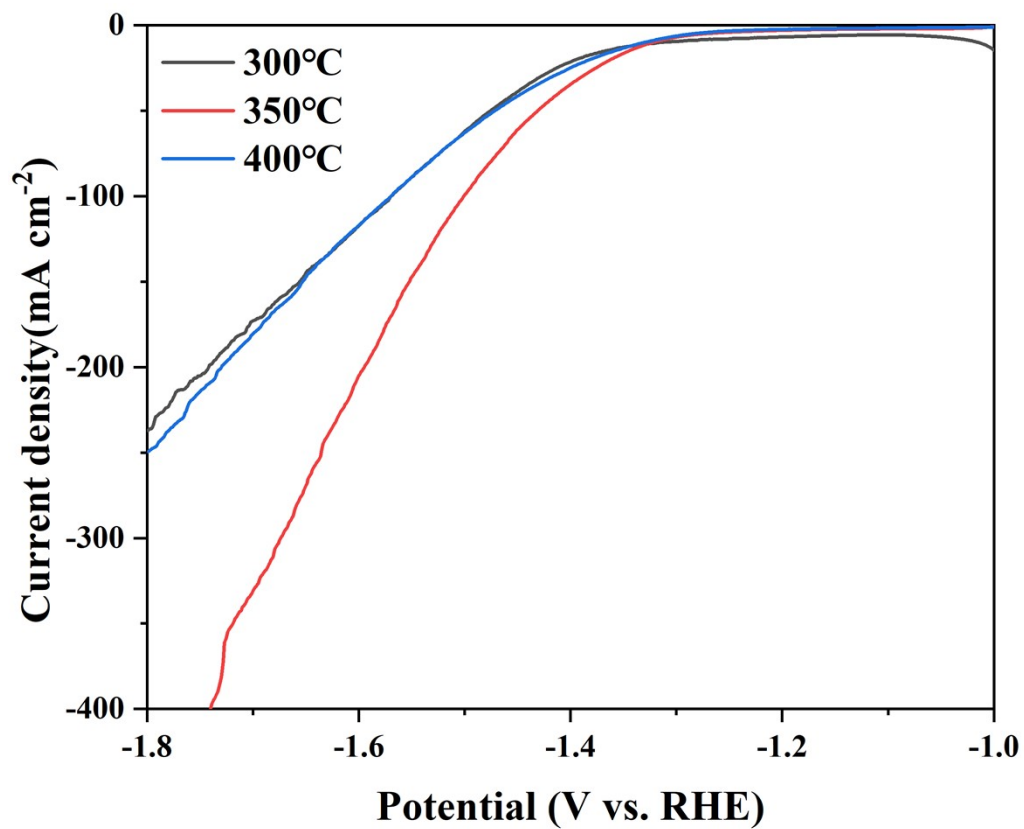

**Figure S15.** HER performances of CuCo-LDO HNTAs with different annealing temperatures.



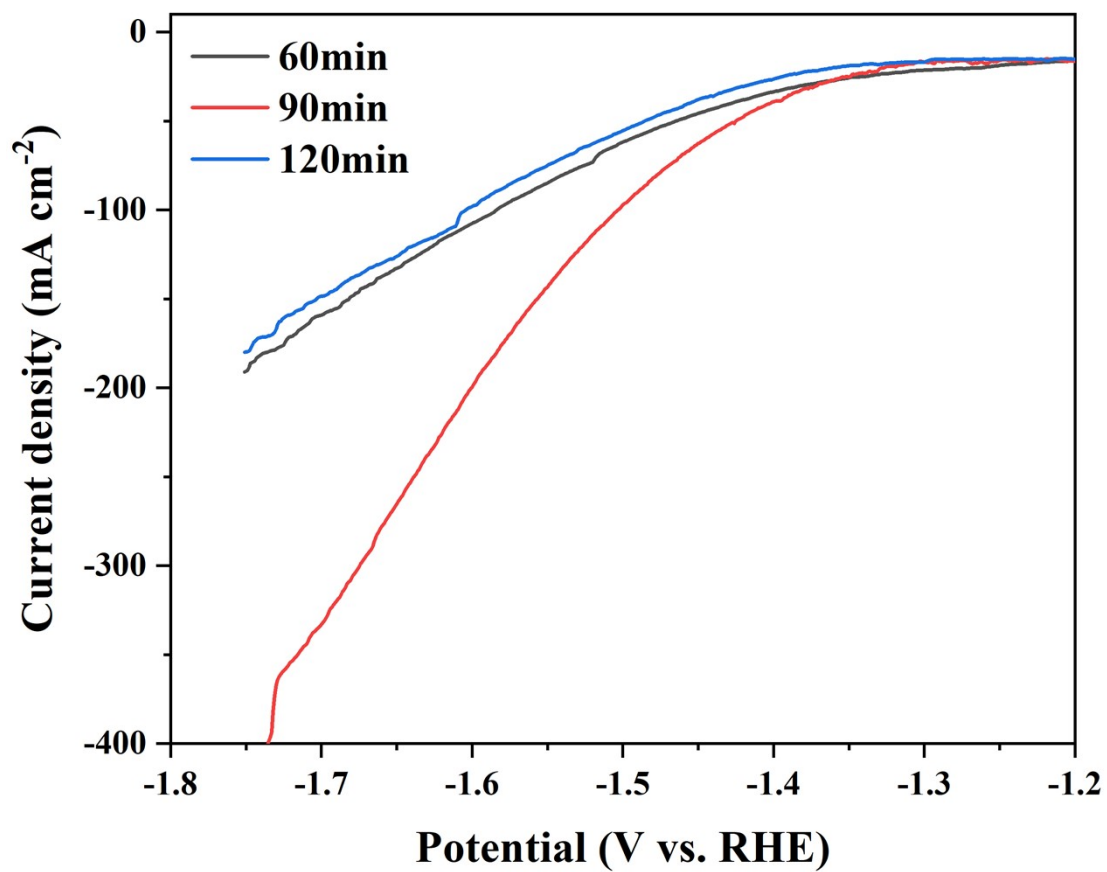

**Figure S16.** HER performances of  $O_v$ -CuCo-LDO HNTAs with different annealing time.

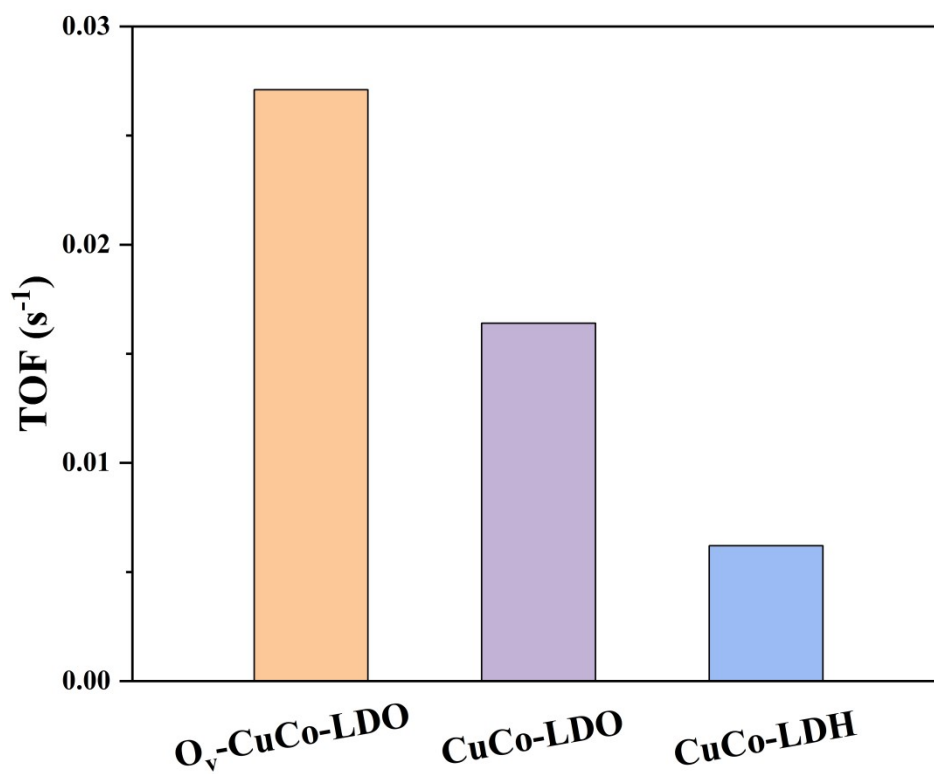

**Figure S17.** The TOF absolute value of O<sub>v</sub>-CuCo-LDO, CuCo-LDO, and CuCo-LDH at an overpotential of -53.9 mV.

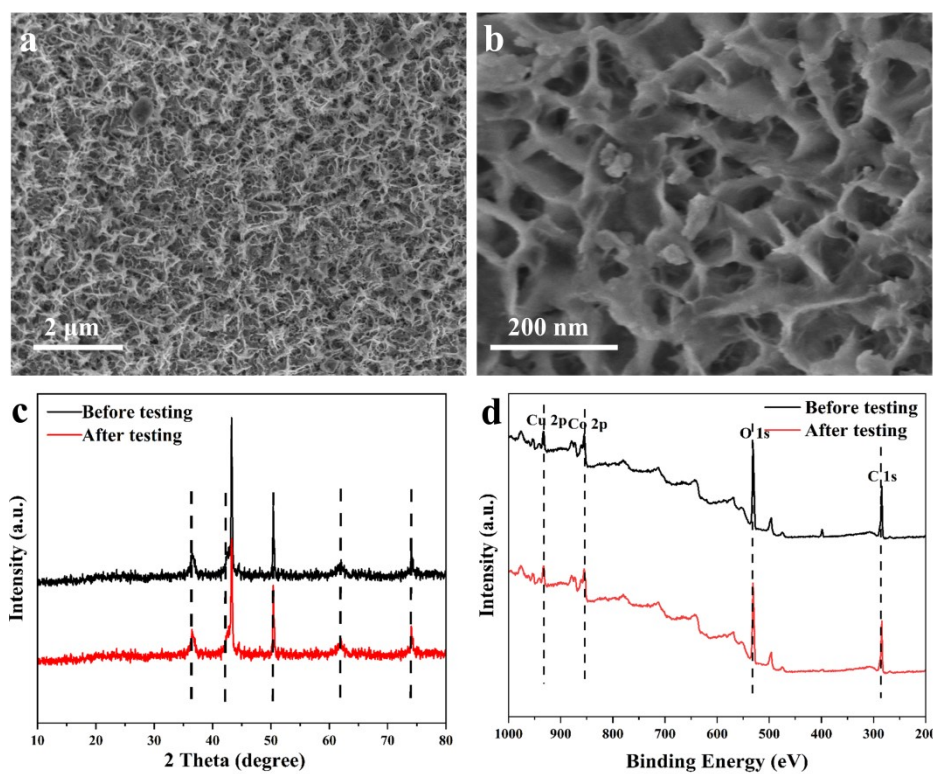

**Figure S18.** SEM images of  $O_v$ -CuCo-LDO after 20 h cycling (a, b), XRD pattern (c), and XPS survey spectrum (d) of  $O_v$ -CuCo-LDO before and after 20 h cycling.

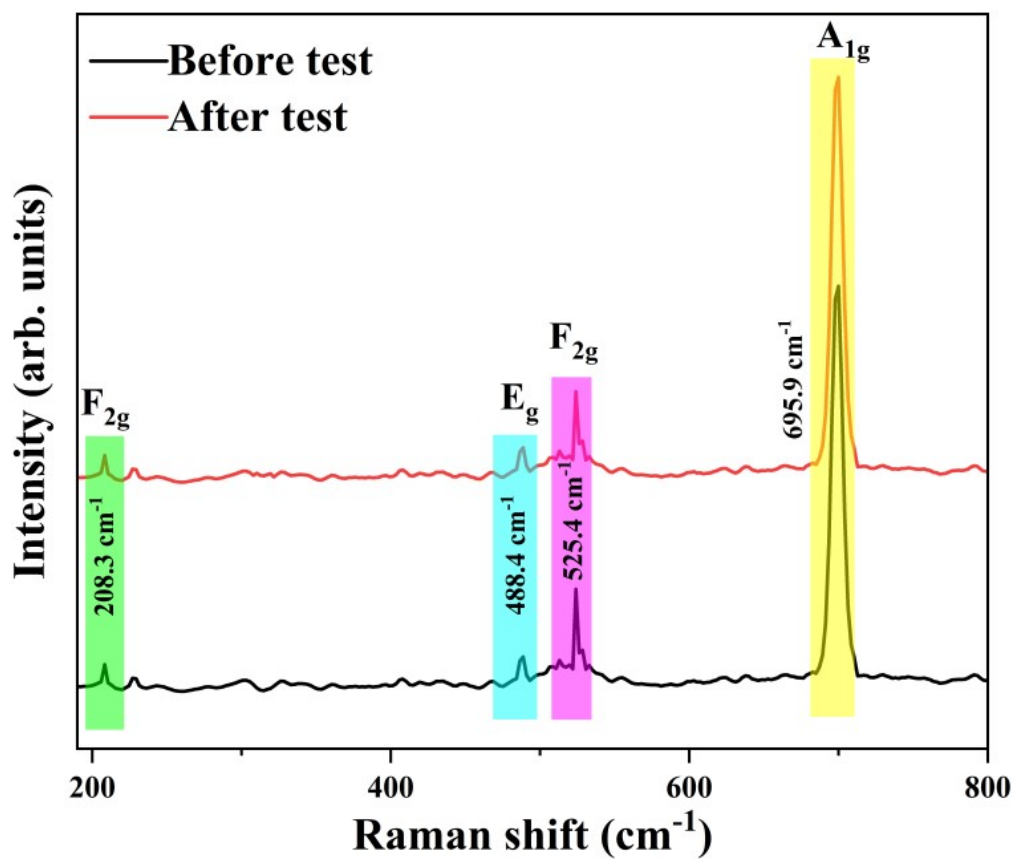

**Figure S19.** Raman spectra of O<sub>v</sub>-CuCo-LDO before and after the continuous electrocatalysis.

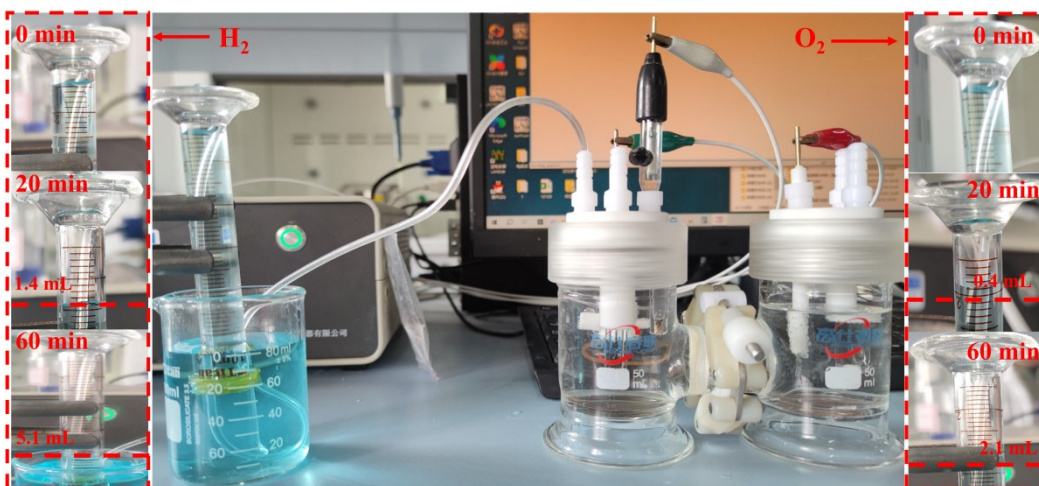

**Figure S20.** Photograph of the gas collection device and the amount of hydrogen and oxygen gas generated at 0 min, 20min, and 60min.

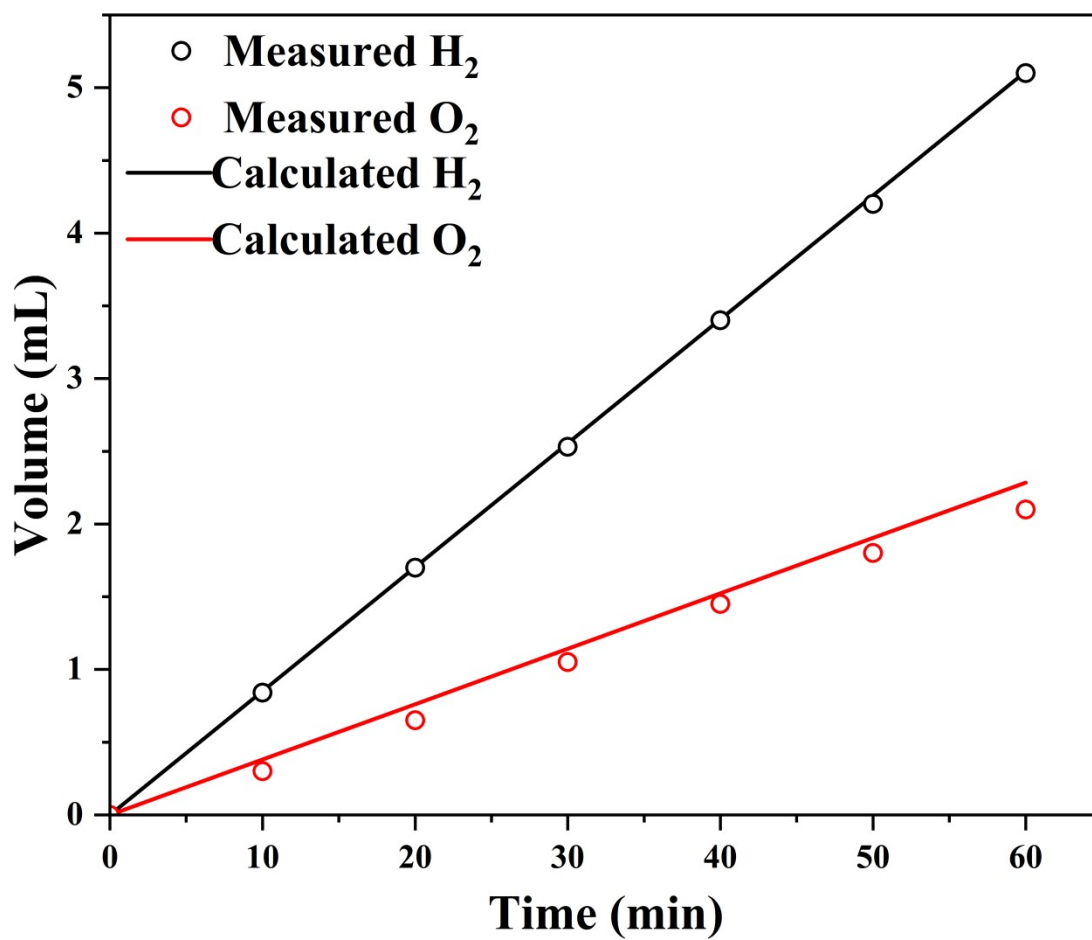

**Figure S21.** Experimental H<sub>2</sub> and O<sub>2</sub> production over time versus theoretical quantities assuming a ~98% Faradaic efficiency for HER and OER in 1.0 M KOH at 10 mA·cm<sup>-2</sup>.

**Table S1.** Comparative electrochemical OER performances of different electrocatalytic materials in alkaline medium

| Catalysts                                                     | Electrolyte | Overpotential (mV)<br>@ 10 mA·cm <sup>-2</sup> | Ref.      |
|---------------------------------------------------------------|-------------|------------------------------------------------|-----------|
| O <sub>v</sub> -CuCo-LDO                                      | 1.0 M KOH   | 72.5                                           | This work |
| Ru@NiCo-MOF HPNs                                              |             | 284                                            | [1]       |
| Cu <sub>1-x</sub> Co <sub>2+x</sub> O <sub>4</sub> nanoflakes |             | 267                                            | [2]       |
| CuCoS/CC                                                      |             | 276                                            | [3]       |
| CoFeO@BP                                                      |             | 266                                            | [4]       |
| Co <sub>3</sub> Mo/CoMoO <sub>x</sub>                         |             | 256                                            | [5]       |
| Mn-CoP                                                        |             | 288                                            | [6]       |
| Ni-Fe LDH@NiCu                                                |             | 218                                            | [7]       |
| Fe-S-NiMoO <sub>4</sub> /MoO <sub>3</sub>                     |             | 212                                            | [8]       |

### References:

- [1]. Liu, D., et al., 3D Porous Ru-Doped NiCo-MOF Hollow Nanospheres for Boosting Oxygen Evolution Reaction Electrocatalysis. *Inorganic Chemistry*, 2021. 60(8): p. 5882-5889.
- [2]. Yang, H., et al., Non-metallic electronic regulation in CuCo oxy-/thio-spinel as advanced oxygen evolution electrocatalysts. *Science China Chemistry*, 2021. 64(1): p. 101-108.
- [3]. Luo, H., et al., Engineering Ternary Copper-Cobalt Sulfide Nanosheets as High-performance Electrocatalysts toward Oxygen Evolution Reaction. *Catalysts*, 2019. 9(5): p. 459.
- [4]. Xingyun Li, L.X.L.Z., Adaptive Bifunctional Electrocatalyst of Amorphous CoFe Oxide @ 2D Black Phosphorus for Overall Water Splitting. *Angewandte Chemie International Edition*, 2020. 47(59): p. 21106-21113.
- [5]. Liu, Y., et al., Interfacing Co<sub>3</sub>Mo with CoMoO<sub>x</sub> for synergistically boosting electrocatalytic hydrogen and oxygen evolution reactions. *Chemical Engineering Journal*, 2022. 431: p. 133240.
- [6]. Liu, Y., et al., Porous Mn-doped cobalt phosphide nanosheets as highly active electrocatalysts for oxygen evolution reaction. *Chemical Engineering Journal*, 2021. 425: p. 131642.
- [7]. Zhou, Y., et al., Exceptional Performance of Hierarchical Ni-Fe (hydr)oxide@NiCu Electrocatalysts for Water Splitting. *Advanced Materials*, 2019. 31(8): p. 1806769.
- [8]. Zhang, Y., et al., MoO<sub>3</sub> crystal facets modulation by doping heteroatom Fe from polyoxometalate for quasi-industrial oxygen evolution reaction. *Applied Catalysis B: Environmental*, 2021. 298: p. 120582.
